## Correspondence between the layered structure of deep language models and temporal structure of natural language processing in the human brain

Authors: Ariel Goldstein<sup>1,2,7\*</sup>, Eric Ham<sup>1,7</sup>, Samuel A. Nastase<sup>1</sup>, Zaid Zada<sup>1</sup>, Avigail Grinstein-Dabus<sup>2</sup>, Bobbi Aubrey<sup>1,3</sup>, Mariano Schain<sup>2</sup>, Harshvardhan Gazula<sup>1</sup>, Amir Feder<sup>2</sup>, Werner Doyle<sup>3</sup>, Sasha Devore<sup>3</sup>, Patricia Dugan<sup>3</sup>, Daniel Friedman<sup>3</sup>, Michael Brenner<sup>2,4</sup>, Avinatan Hassidim<sup>2</sup>, Orrin Devinsky<sup>3</sup>, Adeen Flinker<sup>3,5</sup>, Omer Levy<sup>6,8</sup>, Uri Hasson<sup>1,8</sup>

Affiliations:

<sup>1</sup>Department of Psychology and the Neuroscience Institute, Princeton University, Princeton, NJ

<sup>2</sup>Google Research

<sup>3</sup>New York University Grossman School of Medicine, New York, NY

<sup>4</sup>School of Engineering and Applied Science, Harvard University, Cambridge, MA

<sup>5</sup>New York University Tandon School of Engineering, Brooklyn, NY

<sup>6</sup>Blavatnik School of Computer Science, Tel-Aviv University, Israel

<sup>7</sup>Equal first author

<sup>8</sup>Equal senior authors

\* Corresponding author. Email: [ariel.y.goldstein@gmail.com](mailto:ariel.y.goldstein@gmail.com)

### Abstract

Deep language models (DLMs) provide a novel computational paradigm for how the brain processes natural language. Unlike symbolic, rule-based models described in psycholinguistics, DLMs encode words and their context as continuous numerical vectors. These “embeddings” are constructed by a sequence of layered computations to ultimately capture surprisingly sophisticated representations of linguistic structures. How does this layered hierarchy map onto the human brain during natural language comprehension? In this study, we used ECoG to record neural activity in language areas along the superior temporal gyrus and inferior frontal gyrus while human participants listened to a 30-minute spoken narrative. We supplied this same narrative to a high-performing DLM (GPT2-XL) and extracted the contextual embeddings for each word in the story across all 48 layers of the model. We next trained a set of linear encoding models to predict the temporally-evolving neural activity from the embeddings at each layer. We found a striking correspondence between the layer-by-layer sequence of embeddings from GPT2-XL and the temporal sequence of neural activity in language areas. In addition, we found evidence for the gradual accumulation of recurrent information along the linguistic processing hierarchy. However, we also noticed additional neural processes that took place in the brain, but not in DLMs, during the processing of surprising (unpredictable) words. These findings point to a connection between language processing in humans and DLMs where the layer-by-layer accumulation of contextual information in DLM embeddings matches the temporal dynamics of neural activity in high-order language areas.

### Significance statement

Deep language models transformed our ability to model language. Recent studies connected these neural nets based models to the human representation of language. Here, we show a

striking similarity between the sequence of representations induced by the model and the brain encoding of language over time during real-life comprehension.

## Introduction

Deep language models (DLMs) provide an alternative computational framework for how the human brain processes natural language (1–4). Classical psycholinguistic models rely on rule-based manipulation of symbolical representations embedded in hierarchical tree structures (5, 6). In sharp contrast, DLMs encode words and their context as continuous numerical vectors—i.e. embeddings. These embeddings are constructed via a sequence of non-linear transformations across layers to yield the sophisticated representations of linguistic structures needed to produce language (7–10).

Recent research has begun identifying shared computational principles between the way the human brain and DLMs represent and process natural language. In particular, several studies have used contextual embeddings derived from DLMs to successfully model human behavior as well as neural activity measured by fMRI, EEG, MEG, and ECoG during natural speech processing (1, 2, 11–15). Furthermore, recent studies have shown that similarly to DLMs, the brain incorporates prior context into the meaning of individual words (2, 3, 16–18), spontaneously predicts forthcoming words (1), and computes post-word-onset prediction error signals (1, 13, 19, 20). In this study, we focus on the internal sequence of non-linear transformations of the embeddings across layers within DLMs in relation to the internal processing of words in natural language in the human brain. How do these embeddings change across layers, and how do the layerwise sequence of transformations map onto the processing hierarchy of natural language in the human brain?

Recent work in natural language processing (NLP), has identified certain trends in the properties of embeddings across layers in DLMs (21–23). Embeddings at early layers most closely resemble the static, non-contextual input embeddings (24) and best retain the original word order (25); in contrast, embeddings are thought to become progressively more context-specific and sensitive to long-range linguistic dependencies among words across layers (23, 26). Embeddings at the final layers are typically specialized for the training objective (next-word prediction in the case of GPT2–3) (7, 8). These properties of the embeddings emerge from the conjunction of the architectural specifications of the network, the predictive objective, and the statistical structure of real-world language (1, 27).

In this study, we investigated how the layered structure of DLM embeddings maps onto the temporal dynamics of neural activity in language areas during natural language comprehension. Naively, we may expect the layerwise embeddings to roughly map onto a cortical hierarchy for language processing (similarly to the mapping observed between convolutional neural networks and the primate ventral visual pathway (28, 29). In such a

mapping, early language areas will be better modeled by embedding extracted from early layers of DLMs, whereas higher-order areas will be better modeled by embeddings extracted from later layers of DLMs. Interestingly, studies that examined the layer-by-layer match between DLM embeddings and brain activity using fMRI have observed that intermediate layers tend to provide the best fit across many language ROIs (3, 15, 30, 31). These findings do not support the hypothesis that DLMs capture the processing sequence of words in natural language in the human brain.

In contrast, using ECoG recording with the superior spatiotemporal resolution, we report that the human brain's internal temporal processing of spoken narrative matches the internal sequence of non-linear layerwise transformations in DLMs. The contextual embedding for each word in the narrative was extracted from all 48 layers in a specific DLM (GPT2-XL (7, 8)). Next, we compared the internal sequence of embeddings across the layers of GPT2-XL for each word to the sequence of neural responses recorded via ECoG in human participants. We first replicated the finding that intermediate layers best predict cortical activity. However, the improved temporal resolution of our ECoG recordings revealed a remarkable alignment between the layerwise DLM embedding sequence and the temporal dynamics of cortical activity during natural language comprehension. For example, within the inferior frontal gyrus (IFG; i.e. Broca's area) we observed a temporal sequence of encoding where earlier layers yield peak encoding performance earlier in time relative to word onset, and later layers yield peak encoding performance later in time. This finding suggests that the sequence of transformation across layers in DLMs maps onto a temporal accumulation of information in high-level language areas. Furthermore, we found evidence for the gradual accumulation of recurrent information along the linguistic processing hierarchy. These findings point to a strong connection, with crucial differences, between the way the human brain and DLMs code natural language.

## Results

We collected electrocorticographic (ECoG) data from 9 epilepsy patients while they listened to a 30-minute audio podcast ("Monkey in the Middle", NPR 2017). In prior work (1), we used embeddings from the final hidden layer of GPT2-XL to predict brain activity and found that these contextual embeddings outperform static (i.e. non-contextual) embeddings (see also (3, 16)). In this paper, we expand our analysis by modeling the neural responses for each word in the podcast using contextual embeddings extracted from each of the 48 hidden layers in GPT2-XL (Fig. 1A). We focus on four areas along the ventral language processing stream (32–34): middle superior temporal gyrus (mSTG,  $n = 28$  electrodes), anterior superior temporal gyrus (aSTG,  $n = 13$ ), inferior frontal gyrus (IFG,  $n = 46$ ), and the temporal pole (TP,  $n = 6$ ). We selected electrodes previously shown to have significant encoding performance for static (GloVe) embeddings (corrected for multiple tests). Finally, given that prior studies have

reported improved encoding results for words that are correctly predicted by DLMS (1, 2), we separately model the neural responses for correct predictions (i.e., where GPT2-XL's top-1 next-word predictions were correct;  $n = 1709$ ) versus incorrect predictions. To ensure that we only analyze incorrect predictions and to match the statistical power across the two analyses, we defined incorrect predictions as cases where all top-5 next-word predictions were incorrect ( $n = 1808$ ) (see Figs. S1–3 for analyses of all words combined).

For each layer and each lag (25 ms shifts relative to word onset), we fit a linear regression model using 90% of the words and predict brain activity in the remaining 10% of the words (10-fold cross-validation). We evaluate the performance of our model by correlating our predicted neural responses for each word with the actual neural responses (Fig. 1A–B). The analysis is repeated for each lag, ranging from -2000 ms before word onset (0 ms) to +2000 ms after word onset. We color-coded the encoding performance according to the index of the layer from which the embeddings were extracted, ranging from 1 (red) to 48 (blue; Fig. 1A). To better visualize the temporal dynamic across layers, we scaled the encoding performance to peak at 1 (Fig. 1B, right panel). To evaluate our procedure on specific regions of interest (ROIs), we average the encodings for the electrodes in the relevant ROIs before scaling.

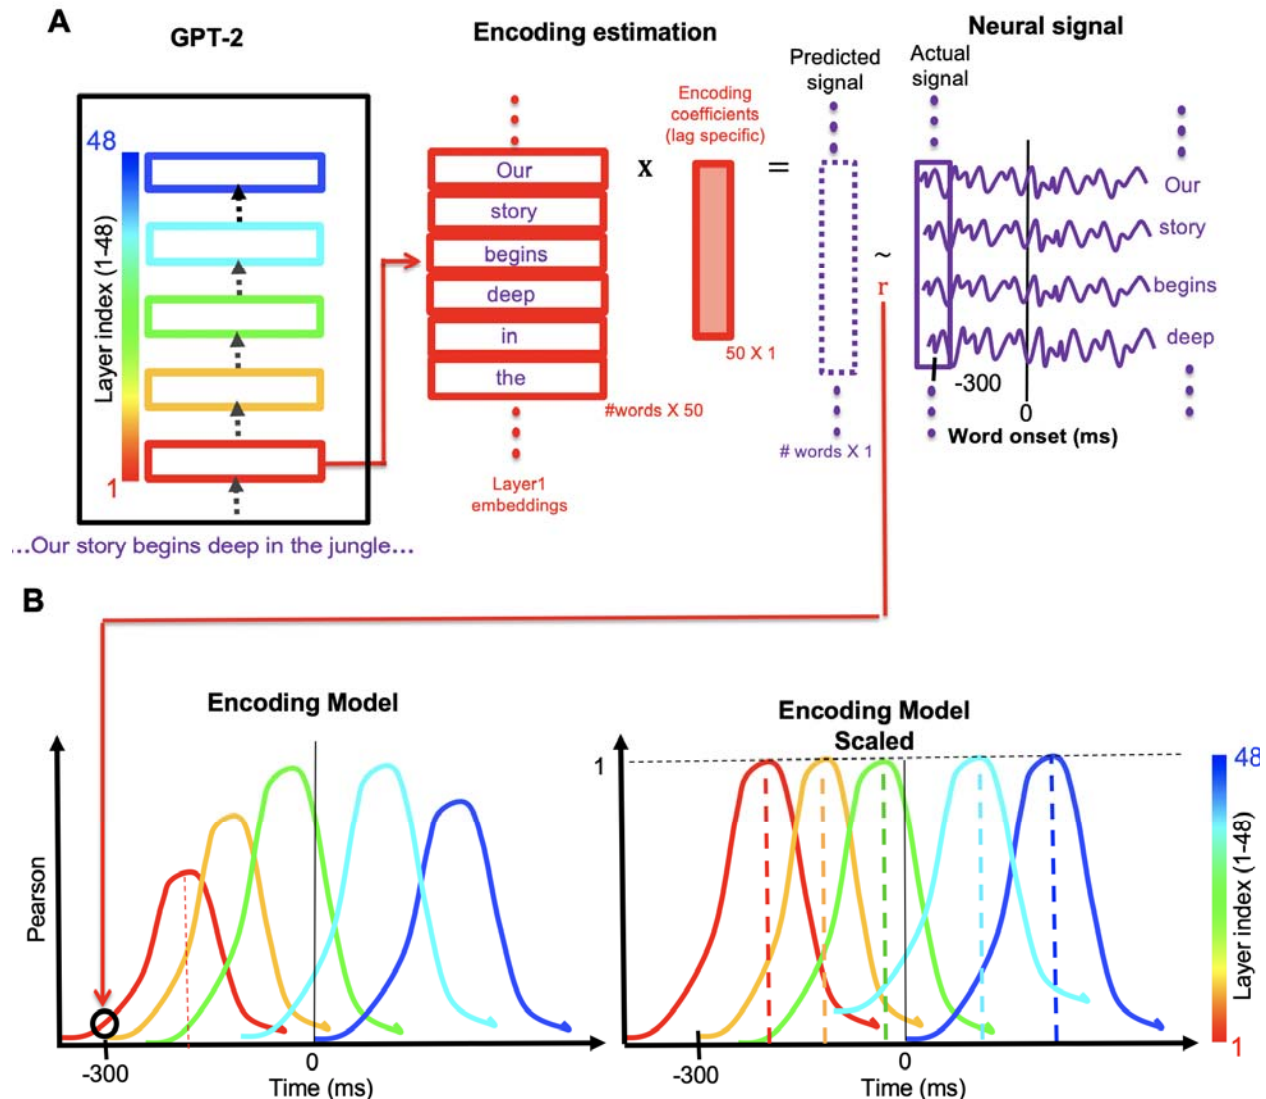

**Figure 1. Layerwise encoding models.** (A) We extracted the neural signal for each specific electrode before and after each word onset (denoted lag 0). The words and the neural signals were split into training and test sets comprising non-overlapping subsets of words for 10-fold cross-validation. The neural signal is averaged over a 200 ms rolling window with incremental shifts of 25 ms. For each word in the story, a contextual embedding is extracted from each layer of GPT-2 (for example, layer 1, red). The dimensionality of the embeddings is reduced to 50 using PCA. For each lag and each electrode, we used linear regression to estimate an encoding model that predicts the neural signal from the word embeddings. In order to evaluate the linear model, we used the 50-dimensional weight vector estimated from the training set to predict the neural signal of the words in the left-out test set from the corresponding embeddings. We evaluated the performance of the model by computing the correlation between the predicted neural signal and the actual neural signal of the words in the test set. (B) This process was repeated for lags ranging from -2000 ms to +2000 ms relative to word onset using the embeddings from each of the 48 hidden layers of GPT2-XL. We then rescaled the performance of the encoding model for each layer to one by normalizing the peak performance; this allows us to more easily visualize the temporal dynamics of encoding performance across layers.

We start by focusing on neural responses for correctly predicted words in electrodes at the inferior frontal gyrus (IFG; Broca's area;  $N = 46$ ), a central region for semantic and syntactic linguistic processing (1, 4, 35–39).

The peak correlation of the encoding models in the IFG was observed for the intermediate layer 22 (Fig. 2B; for other ROIs and predictability conditions, see Supp. Fig. 1). This corroborates recent findings from fMRI (3, 15, 18) where encoding performance peaks for intermediate layers, yielding an inverted U-shaped curve across layers (Fig. 2B). This inverted U-shaped pattern holds for all language areas (Fig. S1), suggesting that the layers of the model do not naively correspond to different cortical areas in the brain.

The fine-grained temporal resolution of ECoG recordings, however, suggests a more subtle dynamic pattern. All 48 layers yield robust encoding in the IFG, with encoding performance near zero at the edges of the lag window (-2000 ms and 2000 ms) and increased performance around word onset. This can be seen in the combined plot of all 48 layers (Fig. 2C; for other ROIs and predictability conditions see Supp. Fig. 2) and when we plot individually selected layers (Fig. 2D, layers 5, 25, 45). A closer look at the encoding results over lags (time) for each layer revealed an orderly dynamic in which the peak encoding performance for the early layers (e.g., layer 5, red, in Fig. 2D) tends to precede the peak encoding performance for intermediate layers (e.g., layer 25, green), which are followed by the later layers (e.g., layer 45, blue). To visualize the temporal sequence across lags we normalized the encoding performance for each layer by scaling its peak performance to 1 (Fig. 2E; for other ROIs and predictability conditions see Supp. Fig. 3). The layerwise encoding models in the IFG tend to peak in an orderly sequence over time. To quantitatively test this claim, we correlated the layer index (1–48) with the lag that yielded the peak correlation (Fig. 2F). The analysis yielded a strong significant positive Pearson correlation of 0.85 ( $p < 10e-13$ ; similar results were obtained with Spearman correlation;  $r = .80$ ). Lastly, we also conducted a non-parametric analysis where we permuted the layer index 100,000 times (keeping the lags that yielded the peak correlations fixed) while correlating the lags with these shuffled layer indices. Using the null distribution, we computed the percentile of the actual correlation ( $r = 0.85$ ) and got a significance of  $p < 10e-5$ . Together, these results suggest that, for correct predictions, the sequence of internal transformations across the layers in GPT2-XL matches the sequence of internal transformations across time within the IFG.

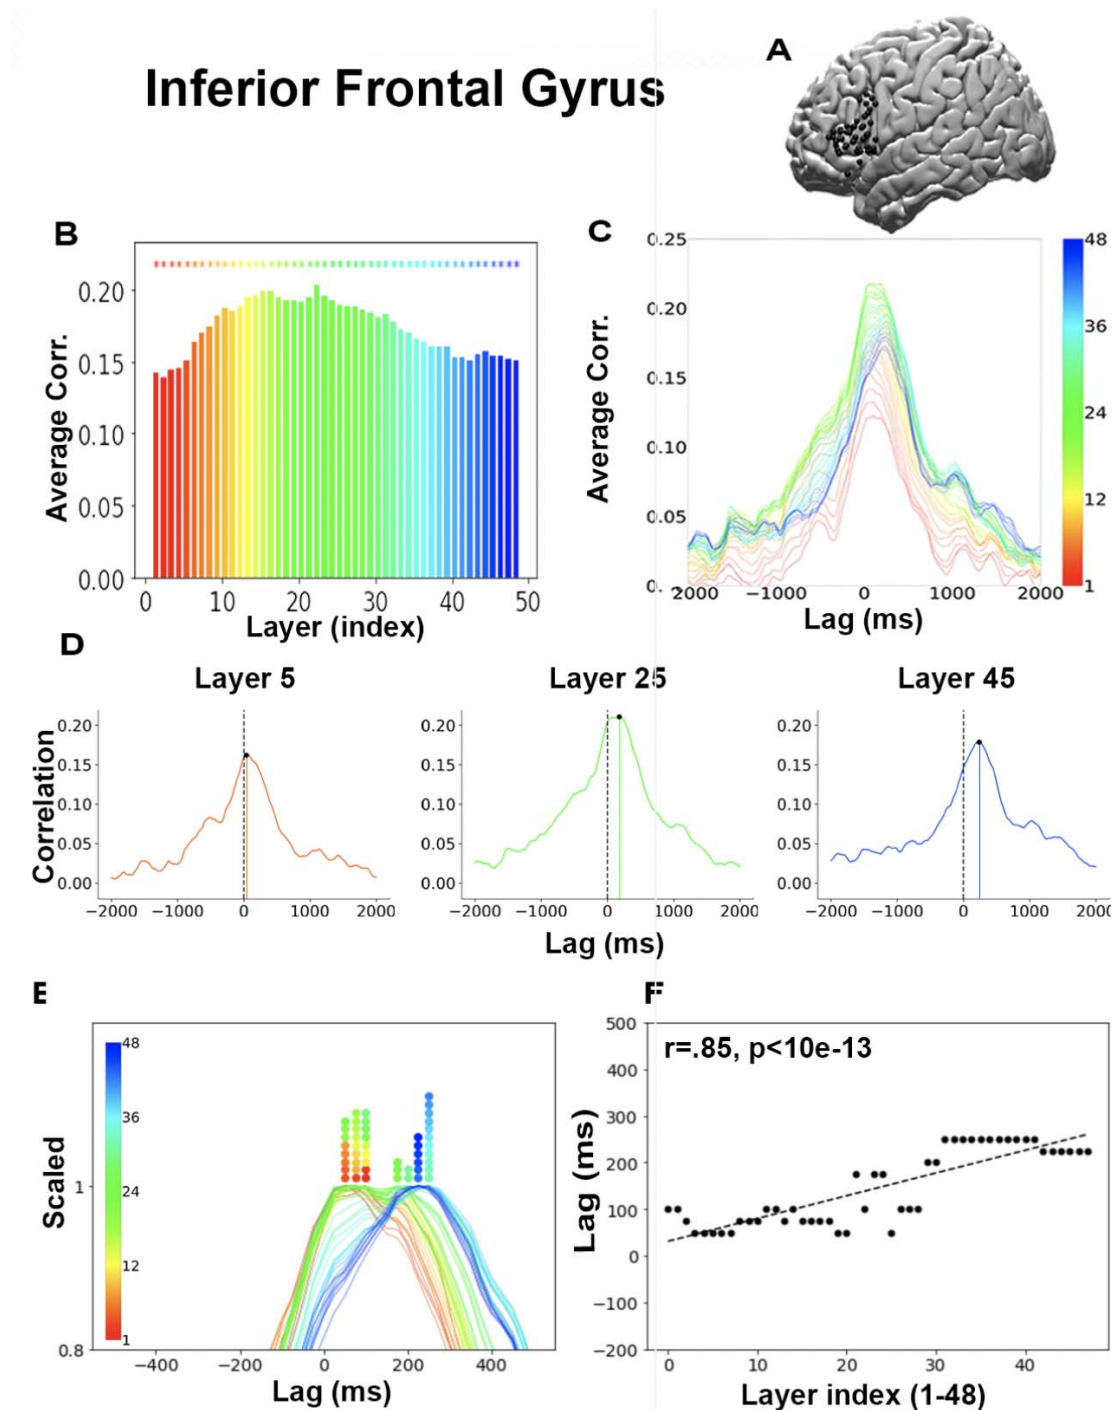

**Figure 2. Temporal dynamics of layerwise encoding for correctly predicted words in IFG.** (A). We recorded from 46 electrodes in the inferior frontal gyrus (IFG) that show positive encoding for word embeddings (GLoVe). (B) For each electrode in the IFG, we performed an encoding analysis for each hidden layer (1-48) at each lag (-2000 ms to 2000 ms). We then averaged encoding performance across all electrodes in the IFG to get a single mean performance value for each lag and layer. We color-coded these encoding performance values according to the index of the layers from which the embeddings were extracted (red to blue). The peak encoding performance

across lags for each layer at each electrode was averaged across electrodes and color-coded from early layers (red) to late layers (blue). Significance was assessed using bootstrap resampling across electrodes (see Materials and Methods). (C) Average correlation across electrodes for each layer at lags ranging from -2000 ms to +2000 ms relative to word onset (lag 0). (D) Encoding performance for layers 5, 25, and 45 demonstrates the layerwise shift of peak performance across lags. (E) Scaled encodings. Each layer encoding peak was scaled to 1. The colored dots mark the peaked encoding lag for each layer. The results show that the deeper the layer is in the model, the later its encoding model peaks (see the sequence from red to blue along the x-axis). (F) Scatter plot of the lag that yields peak encoding performance as a function of the index of layers.

Next, we compared the temporal encoding sequence across three additional temporal language ROIs (Fig. 3), starting with mSTG (near early auditory cortex) and moving up along the ventral linguistic stream to aSTG and TP. We did not observe obvious evidence for a temporal structure in the mSTG ( $r = -.24$ ). This suggests that the temporal dynamic observed in IFG is regionally specific and does not take place in the early stages of the neural processing hierarchy. In addition to the IFG, we found evidence for the same orderly temporal dynamic in aSTG ( $r = .92$ ,  $p < 10e-20$ ) and TP ( $r = .93$ ,  $p < 10e-22$ ). Similar results were obtained with Spearman correlation (mSTG  $r = -.24$ ,  $p = .09$ ; aSTG  $r = .55$ ,  $p = .9$ ; IFG  $r = .79$ ,  $p < 10e-11$ ; TP  $r = .95$ ,  $p < 10e-21$ ), demonstrating that the effect is robust to outliers. Following our procedure for the IFG we conducted permutation tests by shuffling the layers order that yielded the following p-values:  $p < .02$  (mSTG),  $p < 10e-5$  (aSTG, IFG). Furthermore, the width of the temporal sequence gradually increases as we proceed along the ventral linguistic hierarchy (see the increase in steepness of the slopes across language areas in Fig. 3). This was tested using Levene's test which yielded significant differences between the standard deviations of lags that yield maximal correlations for the different layers in the mSTG and aSTG ( $F = 48.1$ ,  $p < .01$ ), as well as between the aSTG and TP ( $F = 5.8$ ,  $p < .02$ ). The largest temporal separation across layer-based encoding models was seen in TP, with more than a 500 ms difference between the peak for layer 1 (around -100 ms) and the peak for layer 48 (around 400 ms).



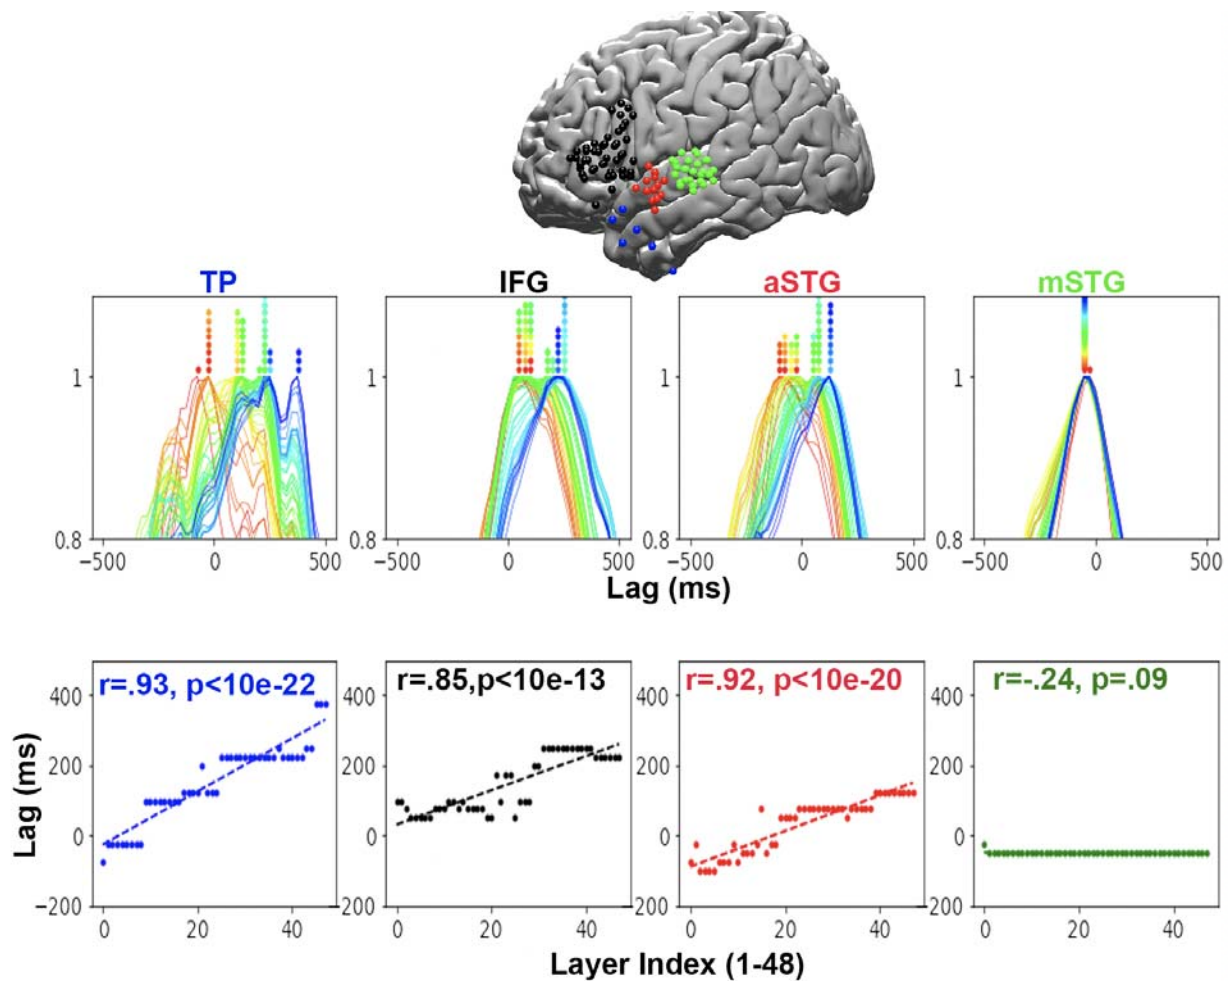

**Figure 3. Temporal hierarchy along the ventral language stream for correctly predicted words.** Scaled encoding for ROIs along the ventral language processing stream, from the middle superior temporal gyrus (mSTG) to the anterior superior temporal gyrus (aSTG), inferior frontal gyrus (IFG), and the temporal pole (TP). The results reveal a temporal sequence of layer-based encoding in all language areas besides mSTG. Furthermore, the processing timescales (slope of lag-difference across layers) increased along the ventral linguistic hierarchy from mSTG to aSTG to IFG and TP.

The temporal correspondence described so far was observed for words the model accurately predicted; does the same pattern hold for words that were not accurately predicted? We conducted the same layerwise encoding analyses in the same ROIs for unpredictable words—i.e. words for which the probability assigned to the word was not among the top-5 highest probabilities assigned by the model ( $N = 1808$ ). We still see evidence, albeit slightly weaker, for layer-based encoding sequences in the IFG ( $r = .81$ ,  $p < 10e-11$ ) and TP ( $r = .57$ ,  $p < 10e-4$ ), but not aSTG ( $r = .09$ ,  $p > .55$ ) or mSTG ( $r = -.10$ ,  $p > .48$ ). Similar results were obtained with Spearman correlation (mSTG  $r = -.10$ ,  $p > .48$ ; aSTG  $r = .02$ ,  $p > .9$ ; IFG  $r = .8$ ,  $p < 10e-11$ ; TP  $r = .72$ ,  $p < 10e-8$ ), demonstrating that the effect is robust to outliers. We conducted permutation tests that yielded the following p-values:  $p > .24$  (mSTG),  $p > .27$  (aSTG),  $p < 10e-5$  (TP, IFG). We also noticed

a crucial difference between the encoding of the correctly and incorrectly predicted words in the IFG. In the IFG the encoding for early layers (red) shifted from around word onset (lag 0) for correct prediction to later lags (around 300ms) for incorrect predictions. We ran a paired t-test to compare the average lags (across the electrodes in a ROI) that yield the maximal correlations (i.e., peak encoding performance) across predicted and unpredicted words for each layer. The paired t-test indicated that the shift in peak encoding (at the ROI level) was significant for 9 out of the 12 first layers (corrected for multiple comparisons see supp. table 1,  $q < 0.05$ ).

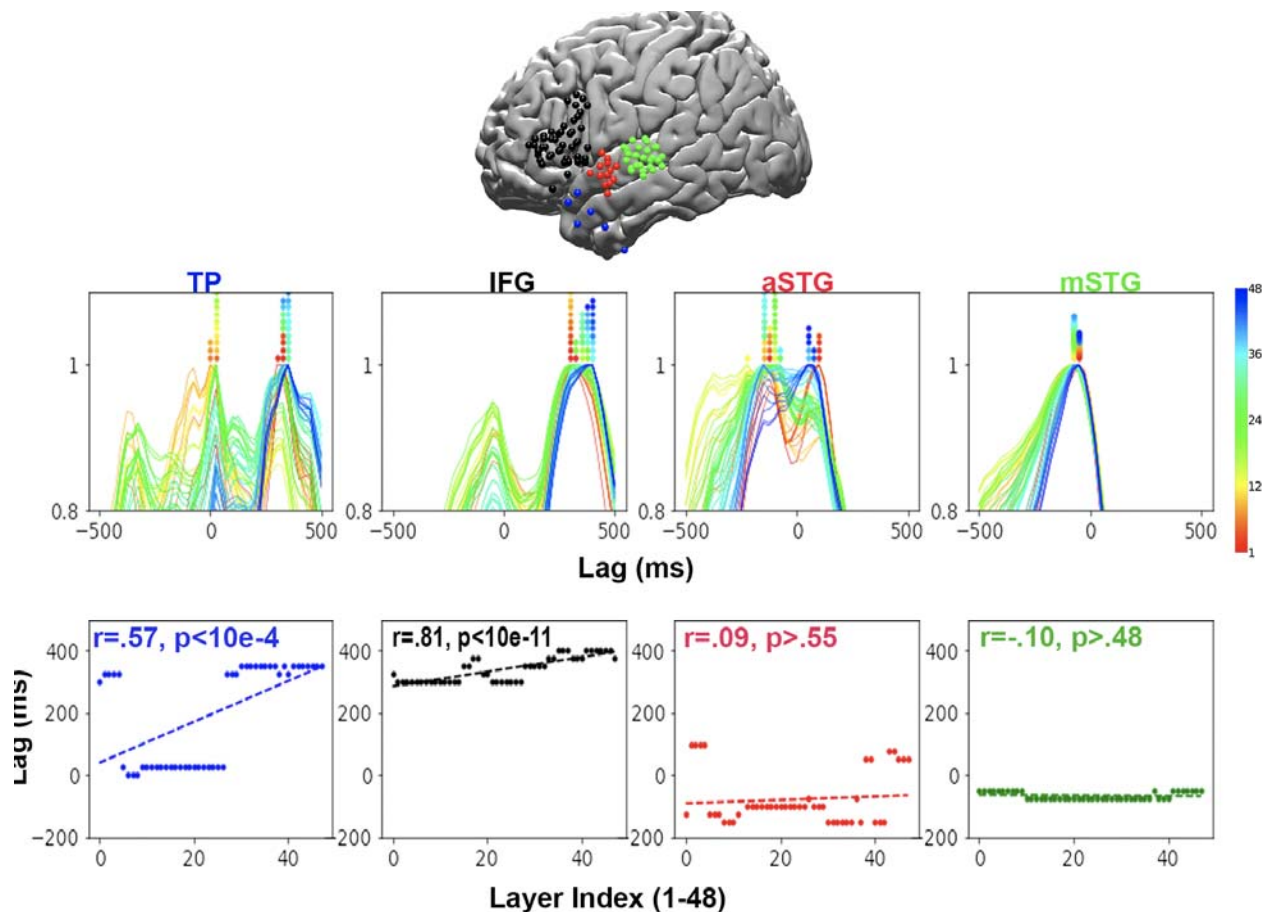

**Figure 4. Temporal hierarchy along the ventral language stream for incorrectly predicted words.** Scaled encoding performance for separate areas along the ventral language pathway, from the middle superior temporal gyrus (mSTG) to the anterior superior temporal gyrus (aSTG), inferior frontal gyrus (IFG), and the temporal pole (TP). The encoding analysis was performed for words that were incorrectly predicted by the model. A word was classified as incorrectly predicted if it was not among the top 5 most probable words predicted by GPT2-XL given the context.

## Discussion

Prior studies reported shared computational principles (e.g., prediction in context and representation using multidimensional embeddings space) between DLMs and the human

brain (1–3). In the current study, we extracted the contextual embeddings for each word in a chosen narrative across all 48 layers and fitted them to the neural responses to each word in our human participants. We found that the *sequence* of layerwise transformations learned by GPT2-XL maps onto the temporal *sequence* of transformations of linguistic input in high-level language areas. This finding reveals a surprising and important link between how DLMs and the brain process language: conversion of discrete input into multidimensional (vectorial) embeddings, which are further transformed via a sequence of non-linear transformations to match the context-based statistical properties of natural language (21). These results provide additional evidence for shared computational principles between the way DLMs and the human brain process natural language.

At the same time, our study also points to implementational differences between the internal sequence of computations in transformer-based DLMs and the human brain. GPT2-XL relies on a “transformer” architecture, a neural network architecture developed to process hundreds to thousands of words in parallel. In other words, transformers are designed to parallelize a task that is largely computed serially, word by word, in the human brain. While transformer-based DLMs process words sequentially over layers, in the human brain we found evidence for similar sequential processing, but over time relative to word onset within a given cortical area. For example, we found that within high-order language areas (such as IFG and TP) the sequence of layerwise processing in DLMs corresponded to a sequence of temporal processing.

What are possible explanations for this result? First, it may be that cortical computations within a given language area are better aligned with recurrent architectures, where the internal computational sequence is deployed over time rather than over layers. In addition, however, we observed evidence for recurrent processing at different time scales across different levels of the linguistic processing hierarchy. That is, the sequence of temporal processing unfolds over longer timescales as we proceed up the processing hierarchy, from aSTG to IFG, and TP. Second, it may be that layered architecture of GPT2-XL is recapitulated within the local connectivity of a given language area like IFG (rather than across cortical areas). That is, local connectivity within a given cortical area may resemble the layered graph structure of GPT2-XL. Third, it is possible that long-range connectivity *between* cortical areas could yield the temporal sequence of processing observed within a single cortical area. Together, these results hint that a deep language model with stacked recurrent networks may better fit the human brain's neural architecture for processing natural language. Interestingly, there have been several attempts to develop such new architectures, such as universal transformers (40, 41) and reservoir computing (42). Future studies will have to compare how the internal processing of natural language compares between these models and the brain.

Previous results indicate that the ability to encode the neural responses in language areas using DLMs varies with the accuracy of their next-word predictions and is lower for incorrect predictions (1, 2). In contrast, we observed that even for unpredicted words, the temporal encoding sequence was maintained in high-order language areas (IFG and TP). However, we do find a difference in the neural responses for unpredictable words in the IFG, in which early layers encoding in IFG shifted from around word-onset for predictable words to around 300-400ms after word-onset for unexpected words (Fig. 4). This finding suggests that the dynamic of neural responses in human language areas is systematically different for predictable and unpredictable words.

Replicating prior studies (3, 11, 16), we also noticed that intermediate layers best matched neural activity in language areas (Fig. S2). Intermediate layers are thought to best capture the syntactic and semantic structure of the input (43, 44) and generally provide the best generalization to other NLP tasks (25). The improved correlation between neural activity and GPT2-XL's intermediate layers suggests that the language areas place additional weight on such intermediate representations. At the same time, each layer's embedding is distinct and represents different linguistic dimension (22), and thus, invoke a unique temporal encoding pattern. Thus, our finding of a gradual sequence of transitions in language areas is complimentary and orthogonal to the level of encoding across layers.

This paper provides strong evidence that DLMs and the brain process language in a similar way. Given the clear circuit-level architectural differences between DLMs and the human brain, the convergence of their internal computational sequences may be surprising. Classical psycholinguistic theories postulated an interpretable rule-based symbolic system for linguistic processing. In contrast, DLMs provide a radically different, statistical learning framework for learning the structure of language by predicting speakers' language use in context. This kind of unexpected mapping (layer sequence to temporal sequence) can point us in novel directions for both understanding the brain and developing neural network architectures that better mimic human language processing. Taken together, this study provides strong evidence for shared internal computations between DLMs and the human brain and calls for a paradigm shift from a symbolic representation of language to a new family of contextual embeddings and statistical learning-based models.

# Materials and methods

## *Data acquisition and preprocessing*

The full procedure is also described at (1). Ten patients (5 female; 20–48 years old) listened to the same story stimulus from beginning to end (story “So a Monkey and a Horse Walk Into a Bar: Act One, Monkey in the Middle”). Participants were not explicitly made aware that we would be examining word prediction in our subsequent analyses. One patient was removed from further analyses, due to excessive epileptic activity and low SNR across all experimental data collected during the day. All patients volunteered for this study via the New York University School of Medicine Comprehensive Epilepsy Center. All participants had elected to undergo intracranial monitoring for clinical purposes and provided oral and written informed consent before study participation, according to the New York University Langone Medical Center Institutional Review Board. Patients were informed that participation in the study was unrelated to their clinical care and that they could withdraw from the study at any point without affecting their medical treatment.

For each patient, electrode placement was determined by clinicians based on clinical criteria. One patient consented to have an FDA-approved hybrid clinical-research grid implanted which includes standard clinical electrodes as well as additional electrodes in between clinical contacts. The hybrid grid provides a higher spatial coverage without changing clinical acquisition or grid placement. Across all patients, a total of 1106 electrodes were placed on the left hemisphere and 233 on the right hemisphere. Brain activity was recorded from a total of 1339 intracranially implanted subdural platinum-iridium electrodes embedded in silastic sheets (2.3 mm diameter contacts, Ad-Tech Medical Instrument; for the hybrid grids 64 standard contacts had a diameter of 2 mm and additional 64 contacts were 1 mm diameter, PMT corporation, Chanassen, MN). Decisions related to electrode placement and invasive monitoring duration were determined solely on clinical grounds without reference to this or any other research study. Electrodes were arranged as grid arrays (8 × 8 contacts, 10 or 5 mm center-to-center spacing), or linear strips.

Pre-surgical and post-surgical T1-weighted MRIs were acquired for each patient, and the location of the electrodes relative to the cortical surface was determined from co-registered MRIs or CTs following the procedure described by Yang and colleagues(45). Co-registered, skull-stripped T1 images were nonlinearly registered to an MNI152 template and electrode locations were then extracted in Montreal Neurological Institute (MNI) space (projected to the surface) using the co-registered image. All electrode maps are displayed on a surface plot of the template, using the Electrode Localization Toolbox for MATLAB available at ([https://github.com/HughWXY/ntools\\_elec](https://github.com/HughWXY/ntools_elec)).

## *Preprocessing*

66 electrodes from all patients were removed due to faulty recordings. The analyses described are at the electrode level. Large spikes exceeding 4 quartiles above and below the median were removed and replacement samples were imputed using cubic interpolation. We then re-referenced the data to account for shared signals across all channels using either the Common Average Referencing (CAR) method or an ICA-based method (based on the participant's noise profile). High-frequency broadband (HFBB) power frequency provided evidence for a high positive correlation between local neural firing rates and high gamma activity. Broadband power was estimated using 6-cycle wavelets to compute the power of the 70-200 Hz band, excluding 60, 120, 180 Hz line noise. Power was further smoothed with a Hamming window with a kernel size of 50 ms. For full technical description see (1).

### *Linguistic embeddings*

In order to extract contextual embeddings for the stimulus text, we first tokenized the words for compatibility with GPT2-XL. We then ran the GPT2-XL model implemented in HuggingFace (46) on this tokenized input. To construct the embeddings for a given word, we passed the set of up to 1023 words preceding the word (the context) along with the current word as input to the model. We include the current word for convenience, but the embedding we extract is the output generated for the previous word. This means that the current word is not used to generate its own embedding and its context only includes previous words. We constrain the model in this way because our human participants do not have access to the words in the podcast before they are said during natural language comprehension.

GPT2-XL is structured as a set of blocks that each contain a self-attention sub-block and a subsequent feedforward sub-block. The output of a given block is the summation of the feedforward output and the self-attention output through a residual connection. This output is also known as a "hidden state" of GPT2-XL. We consider this hidden state to be the contextual embedding for the block that precedes it. For convenience, we refer to the blocks as "layers"; that is, the hidden state of output by block 3 is referred to as the contextual embedding for layer 3. In order to generate the contextual embeddings for each layer, we store each layer's hidden state for each word in the input text. Fortunately, the HuggingFace implementation of GPT2-XL automatically stores these hidden states when a forward pass of the model is conducted. Different models have different numbers of layers and embeddings of different dimensionality. The model used herein, GPT2-XL, has 48 layers and the embeddings at each layer comprise 1600-dimensional vectors. For a sample of text containing 101 tokens, we would generate an embedding for each layer and each word, excluding the first word as it has no prior context. This results in 48 1600-dimensional embeddings per word and 100 words;  $48 * 100 = 4800$  total 1600-long embedding vectors. Note that in this example the context length would increase from 1 to 100 as we proceed through the text.

### *Dimensionality reduction*

Before fitting the encoding models, we first reduce the dimensionality of the embeddings by applying principal component analysis (PCA) and retaining the first 50 components. This procedure effectively focuses our subsequent analysis on the 50 orthogonal dimensions in the embedding space that account for the most variance in the stimulus.

### *Encoding models:*

Linear encoding models were estimated at each lag (-2000 ms to 2000 ms in 25-ms increments) relative to word onset (0 ms) to predict the brain activity for each word from the corresponding contextual embedding. Before fitting the encoding model, we smoothed the signal using a rolling 200-ms window. We used a 10-fold cross-validation procedure ensuring that for each cross-validation fold, the model was estimated from a subset of training words and evaluated on a non-overlapping subset of held-out test words: the words and the corresponding brain activity were split into a training set (90% of the words) for model estimation and a test set (10% of the words) for model evaluation. Encoding models were estimated separately for each electrode (and each lag relative to word onset). For each cross-validation fold, we used ordinary least squares (OLS) multiple linear regression to estimate a weight vector (50 coefficients for the 50 PCA components) based on the training words. We then used those weights to predict the neural responses at each electrode for the test words. We evaluated model performance by computing the correlation between the predicted brain activity and the actual brain activity across the held-out test words; we then averaged these correlations across electrodes. This procedure was performed for all the hidden states in GPT2-XL to generate an “encoding” for each layer.

### *Correct and incorrect predictions*

After generating encodings for all words in the podcast transcript, we split the embeddings into two subsets: words that the model predicted correctly and words that the model predicted incorrectly. A word was considered to be predicted correctly if the model assigned that word the highest probability of occurring next among all possible words. We refer to these subsets of embeddings as “top 1 predictable” (1709/4744 = 36%) and “top 5 predictable”. To reduce the stringency of top 1 prediction, we also created subsets of “top 5 predictable” (2936/4744 = 62%) and “top 5 unpredictable” words where the criterion for correctness was that the probability for the correct word must be among the highest five probabilities assigned to words by the model. We then trained linear encoding models as outlined above on these subsets of embeddings.

### **Statistical significance**

To establish the significance of the bars in Fig. 2B we conducted a bootstrapping analysis for each lag. Given the values of the electrodes in a specific layer and a specific ROI, we sampled

the max correlations values with replacement  $10^4$  samples with the size of the number of electrodes. For each sample we computed the average and generated a distribution (consisting of  $10^4$  points). We then compared the actual mean for the lag-ROI pair to estimate how significant it is given the generated distributions. The '\*' indicates two-tailed significance of  $p < 0.01$ .

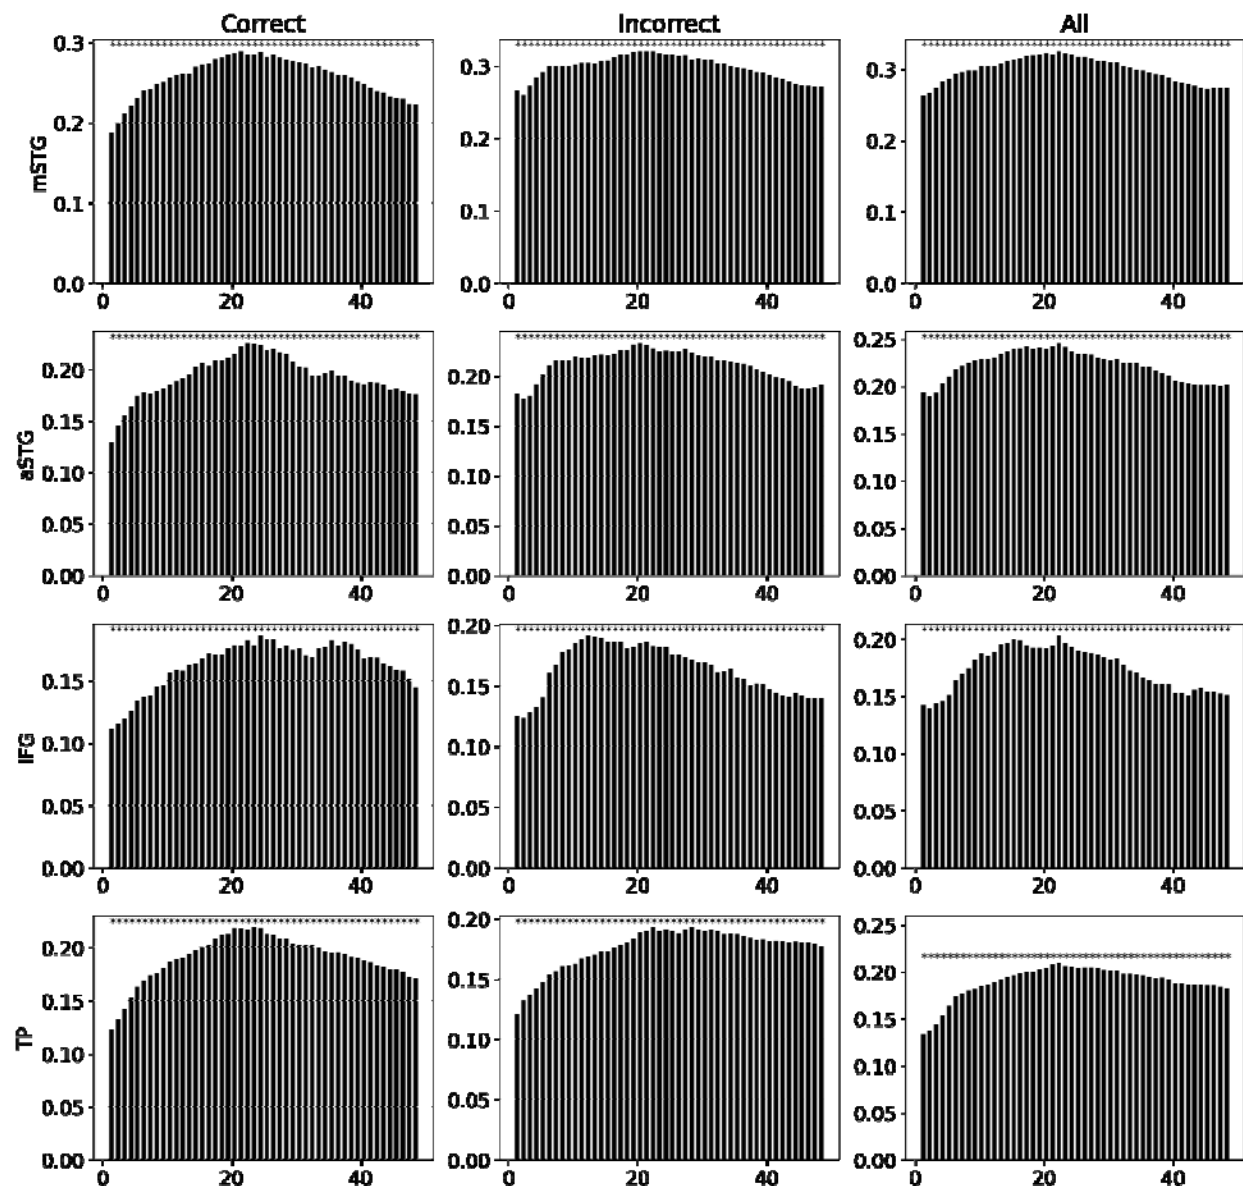

**Supplementary Figure 1.** Peak correlations of electrode-averaged encodings for each



combination of layer (1-48) and brain area (mSTG, aSTG, IFG and TP) and word classification (correctly predicted, incorrectly predicted, all words). The significance test is done using bootstrap analysis across the electrodes.

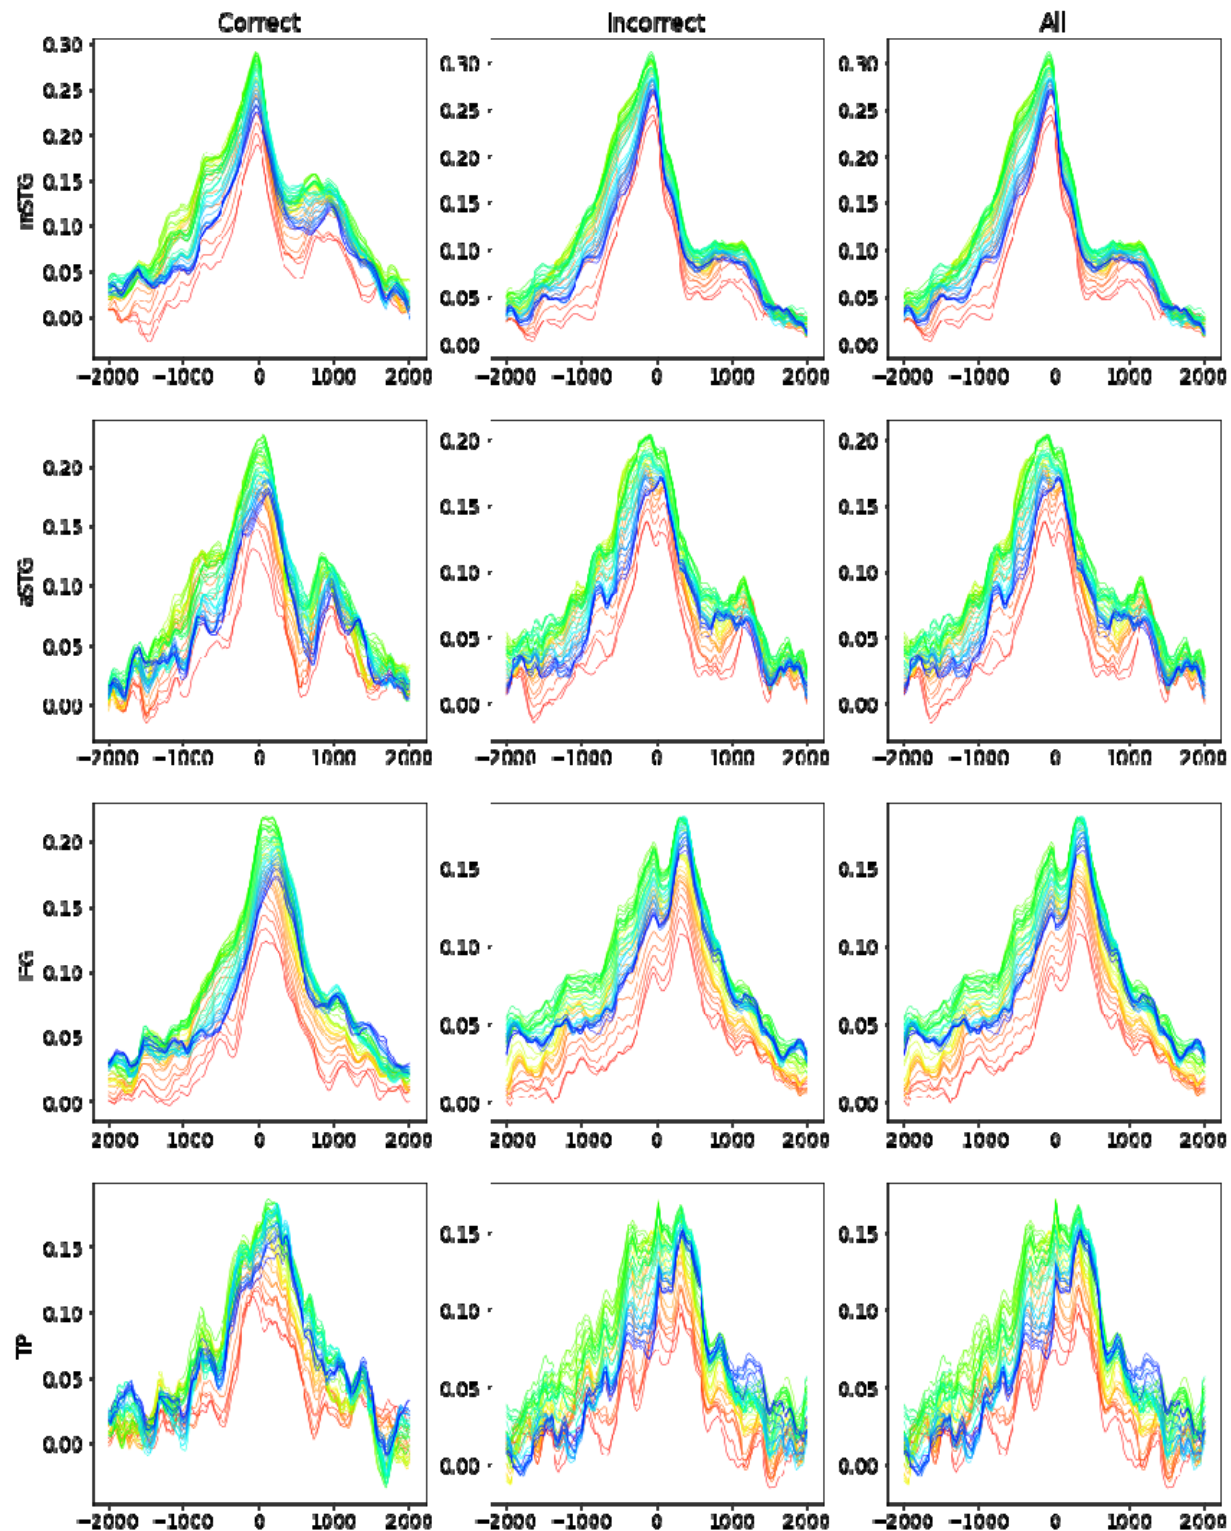

**Supplementary Figure 2.** Encoding averaged over electrodes for each combination of layer (1-48), brain area (mSTG, aSTG, IFG and TP) and word classification (correctly predicted, incorrectly predicted, all words).

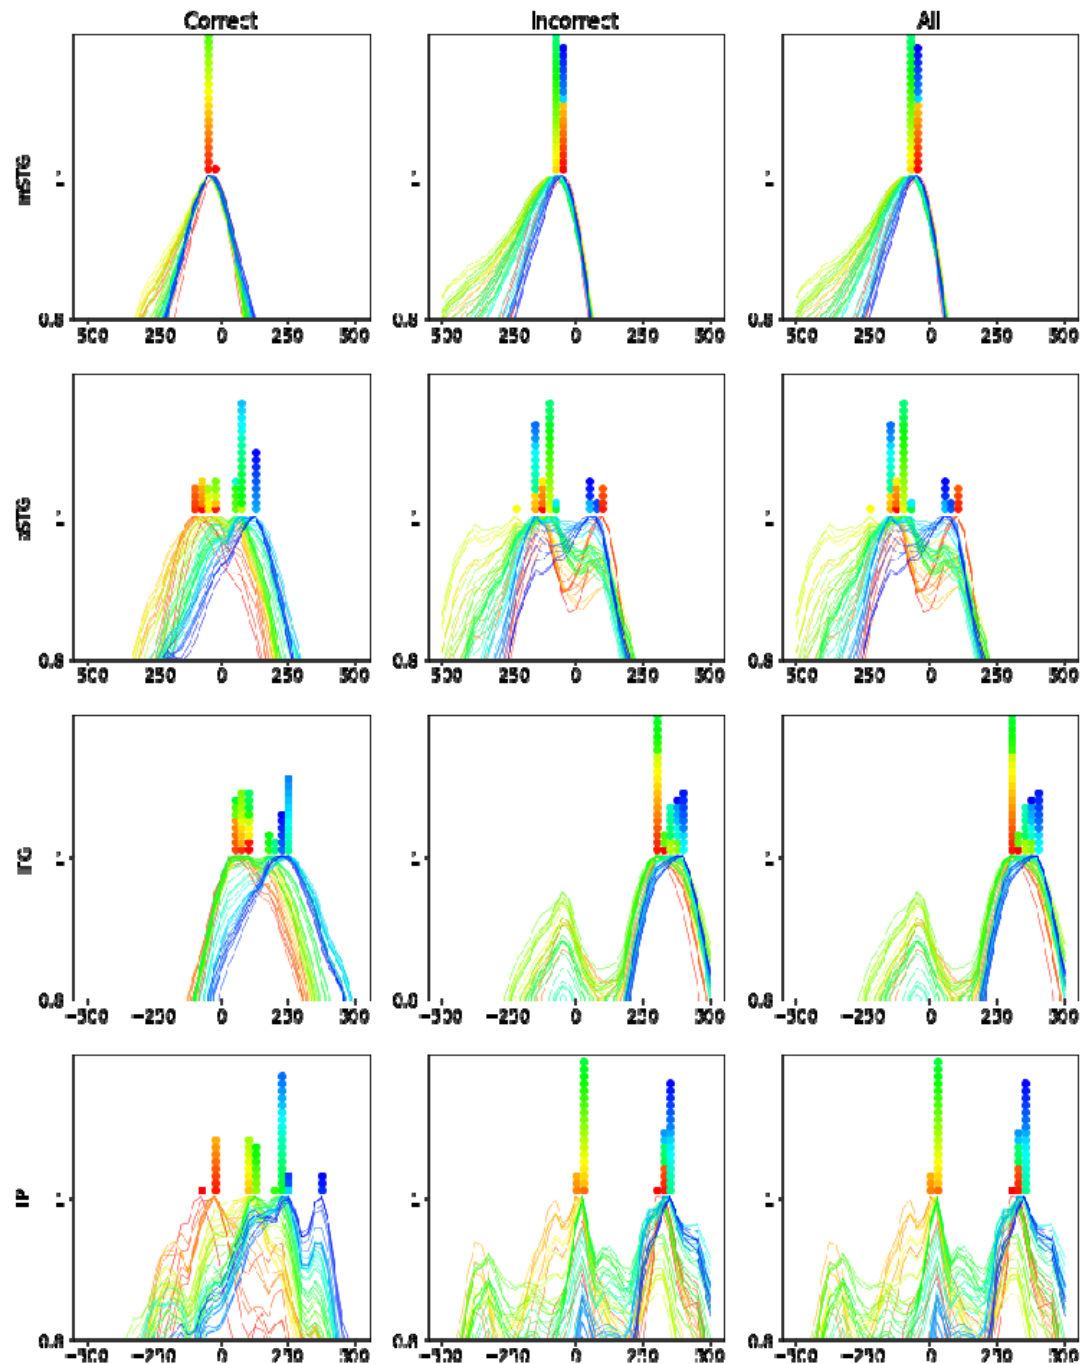

**Supplementary Figure 3.** Scaled encoding for each combination of layer (1-48), brain area (mSTG, aSTG, IFG and TP) and word classification (correctly predicted, incorrectly predicted, all words). For completion the correlation between the layer index and max-lag for condition 'All': mSTG ( $r=.56$ ,  $p<10e-4$ ), aSTG ( $r=.81$ ,  $p<10e-11$ ), IFG ( $r=.89$ ,  $p<10e-16$ ), TP ( $r=.75$ ,  $p<10e-9$ )

| Layer index | p. value | q-value  | Layer index | p-value  | q-value  |
|-------------|----------|----------|-------------|----------|----------|
| 1           | 0.784826 | 0.459996 | 25          | 0.731631 | 0.3963   |
| 2           | 0.061834 | 0.015458 | 26          | 0.719935 | 0.360514 |
| 3           | 0.016337 | 0.000953 | 27          | 0.608419 | 0.278859 |
| 4           | 0.016337 | 0.00111  | 28          | 0.569881 | 0.249323 |
| 5           | 0.409457 | 0.153546 | 29          | 0.38613  | 0.136755 |
| 6           | 0.016337 | 0.001688 | 30          | 1        | 0.949051 |
| 7           | 0.016337 | 0.001847 | 31          | 0.990003 | 0.696491 |
| 8           | 0.035199 | 0.0066   | 32          | 1        | 0.906098 |
| 9           | 0.016522 | 0.002409 | 33          | 1        | 0.94135  |
| 10          | 0.023182 | 0.003864 | 34          | 1        | 0.922248 |
| 11          | 0.016337 | 0.002042 | 35          | 1        | 0.9526   |
| 12          | 0.051168 | 0.01066  | 36          | 0.719935 | 0.374966 |
| 13          | 0.283744 | 0.094581 | 37          | 0.927577 | 0.618385 |
| 14          | 0.276009 | 0.086253 | 38          | 1        | 0.844096 |
| 15          | 0.21497  | 0.0627   | 39          | 0.784826 | 0.474165 |
| 16          | 0.059726 | 0.013687 | 40          | 0.927577 | 0.61807  |
| 17          | 0.016337 | 0.000372 | 41          | 0.820915 | 0.513072 |
| 18          | 0.191238 | 0.051794 | 42          | 1        | 0.961332 |
| 19          | 0.425111 | 0.168273 | 43          | 1        | 0.736217 |
| 20          | 0.990003 | 0.701252 | 44          | 1        | 0.942203 |
| 21          | 1        | 0.993479 | 45          | 0.548249 | 0.228437 |
| 22          | 0.749748 | 0.421733 | 46          | 1        | 0.968246 |
| 23          | 0.703456 | 0.337073 | 47          | 1        | 1        |
| 24          | 1        | 0.825196 | 48          | 1        | 0.907848 |

**Supplementary Table 1.** The p value and FDR-corrected q-value of the paired sampled t-test comparing the lags that achieve maximal correlation in the encoding across the different layers (n=48) of GPT2-XL.

# References

1. A. Goldstein, *et al.*, Shared computational principles for language processing in humans and deep language models. *Nat. Neurosci.* **25**, 369–380 (2022).
2. C. Caucheteux, J.-R. King, Brains and algorithms partially converge in natural language processing. *Commun Biol* **5**, 134 (2022).
3. M. Schrimpf, *et al.*, The neural architecture of language: Integrative modeling converges on predictive processing. *Proc. Natl. Acad. Sci. U. S. A.* **118** (2021).
4. X. Yang, *et al.*, Uncovering cortical activations of discourse comprehension and their overlaps with common large-scale neural networks. *NeuroImage* **203**, 116200 (2019).
5. R. B. Lees, N. Chomsky, Syntactic Structures. *Language* **33**, 375 (1957).
6. E. Kako, L. Wagner, The semantics of syntactic structures. *Trends in Cognitive Sciences* **5**, 102–108 (2001).
7. A. Radford, *et al.*, Language models are unsupervised multitask learners. *OpenAI blog* **1**, 9 (2019).
8. T. Brown, *et al.*, Language models are few-shot learners. *Adv. Neural Inf. Process. Syst.* **33**, 1877–1901 (2020).
9. Z. Yang, *et al.*, XLNet: Generalized Autoregressive Pretraining for Language Understanding in *Advances in Neural Information Processing Systems*, H. Wallach, *et al.*, Eds. (Curran Associates, Inc., 2019).
10. D. Adiwardana, *et al.*, Towards a Human-like Open-Domain Chatbot. *arXiv [cs.CL]* (2020).
11. D. Schwartz, M. Toneva, L. Wehbe, “Inducing brain-relevant bias in natural language processing models” in *Advances in Neural Information Processing Systems* 32, H. Wallach, *et al.*, Eds. (Curran Associates, Inc., 2019), pp. 14123–14133.
12. N. Hollenstein, *et al.*, Decoding EEG Brain Activity for Multi-Modal Natural Language Processing. *Front. Hum. Neurosci.* **15**, 659410 (2021).
13. M. Heilbron, K. Armeni, J. M. Schoffelen, P. Hagoort, A hierarchy of linguistic predictions during natural language comprehension. *bioRxiv* (2020).
14. R. Antonello, J. Turek, V. Vo, A. Huth, Low-Dimensional Structure in the Space of Language Representations is Reflected in Brain Responses. *arXiv [cs.CL]* (2021).
15. M. Toneva, L. Wehbe, Interpreting and improving natural-language processing (in machines) with natural language-processing (in the brain) in *33rd Conference on Neural*

*Information Processing Systems (NeurIPS 2019), Vancouver, Canada., (2019).*

16. C. Caucheteux, A. Gramfort, J.-R. King, GPT-2's activations predict the degree of semantic comprehension in the human brain <https://doi.org/10.1101/2021.04.20.440622>.
17. S. Jain, A. G. Huth, Incorporating Context into Language Encoding Models for fMRI <https://doi.org/10.1101/327601>.
18. C. Caucheteux, A. Gramfort, J. R. King, GPT-2's activations predict the degree of semantic comprehension in the human brain. *bioRxiv* (2021).
19. P. W. Donhauser, S. Baillet, Two Distinct Neural Timescales for Predictive Speech Processing. *Neuron* **105**, 385–393.e9 (2020).
20. R. M. Willems, S. L. Frank, A. D. Nijhof, P. Hagoort, A. van den Bosch, Prediction During Natural Language Comprehension. *Cerebral Cortex* **26**, 2506–2516 (2016).
21. C. D. Manning, K. Clark, J. Hewitt, U. Khandelwal, O. Levy, Emergent linguistic structure in artificial neural networks trained by self-supervision. *Proc. Natl. Acad. Sci. U. S. A.* **117**, 30046–30054 (2020).
22. A. Rogers, O. Kovaleva, A. Rumshisky, A primer in bertology: What we know about how bert works. *Transactions of the Association for Computational Linguistics* **8**, 842–866 (2020).
23. I. Tenney, D. Das, E. Pavlick, BERT Rediscovered the Classical NLP Pipeline. *arXiv [cs.CL]* (2019).
24. K. Ethayarajh, How Contextual are Contextualized Word Representations? Comparing the Geometry of BERT, ELMo, and GPT-2 Embeddings. *arXiv [cs.CL]* (2019).
25. N. F. Liu, M. Gardner, Y. Belinkov, M. E. Peters, N. A. Smith, Linguistic Knowledge and Transferability of Contextual Representations. *Proceedings of the 2019 Conference of the North* (2019) <https://doi.org/10.18653/v1/n19-1112>.
26. L. Cui, Y. Zhang, Hierarchically-Refined Label Attention Network for Sequence Labeling. *Proceedings of the 2019 Conference on Empirical Methods in Natural Language Processing and the 9th International Joint Conference on Natural Language Processing (EMNLP-IJCNLP)* (2019) <https://doi.org/10.18653/v1/d19-1422>.
27. U. Hasson, S. A. Nastase, A. Goldstein, Direct Fit to Nature: An Evolutionary Perspective on Biological and Artificial Neural Networks. *Neuron* **105**, 416–434 (2020).
28. U. Güçlü, M. A. J. van Gerven, Deep Neural Networks Reveal a Gradient in the Complexity of Neural Representations across the Ventral Stream. *J. Neurosci.* **35**, 10005–10014 (2015).

29. D. L. K. Yamins, J. J. DiCarlo, Using goal-driven deep learning models to understand sensory cortex. *Nat. Neurosci.* **19**, 356–365 (2016).
30. S. M. Caucheteux, V. Piguet, Extracellular Adenosine Triphosphate: A Modulator of Cutaneous Candida albicans Infection. *J. Invest. Dermatol.* **141**, 2107–2108 (2021).
31. S. Kumar, *et al.*, Reconstructing the cascade of language processing in the brain using the internal computations of a transformer-based language model <https://doi.org/10.1101/2022.06.08.495348>.
32. G. Hickok, D. Poeppel, Dorsal and ventral streams: a framework for understanding aspects of the functional anatomy of language. *Cognition* **92**, 67–99 (2004).
33. H. O. Karnath, New insights into the functions of the superior temporal cortex. *Nat. Rev. Neurosci.* **2**, 568–576 (2001).
34. O. Poliva, From Mimicry to Language: A Neuroanatomically Based Evolutionary Model of the Emergence of Vocal Language. *Front. Neurosci.* **10**, 307 (2016).
35. P. Hagoort, P. Indefrey, The neurobiology of language beyond single words. *Annu. Rev. Neurosci.* **37**, 347–362 (2014).
36. P. Hagoort, On Broca, brain, and binding: a new framework. *Trends Cogn. Sci.* **9**, 416–423 (2005).
37. B. Ishkhanyan, *et al.*, Anterior and Posterior Left Inferior Frontal Gyrus Contribute to the Implementation of Grammatical Determiners During Language Production. *Front. Psychol.* **11**, 685 (2020).
38. L. L. LaPointe, *Paul Broca and the Origins of Language in the Brain* (Plural Publishing, 2012).
39. D. Saur, *et al.*, Ventral and dorsal pathways for language. *Proc. Natl. Acad. Sci. U. S. A.* **105**, 18035–18040 (2008).
40. M. Dehghani, S. Gouws, O. Vinyals, J. Uszkoreit, Ł. Kaiser, Universal Transformers. *arXiv [cs.CL]* (2018).
41. Z. Lan, *et al.*, ALBERT: A Lite BERT for Self-supervised Learning of Language Representations. *arXiv [cs.CL]* (2019).
42. P. F. Dominey, Narrative event segmentation in the cortical reservoir. *PLoS Comput. Biol.* **17**, e1008993 (2021).
43. J. Hewitt, C. D. Manning, A structural probe for finding syntax in word representations in *Proceedings of the 2019 Conference of the North American Chapter of the Association for*

*Computational Linguistics: Human Language Technologies, Volume 1 (Long and Short Papers)*, (2019), pp. 4129–4138.

44. G. Jawahar, B. Sagot, D. Seddah, What Does BERT Learn about the Structure of Language? *Proceedings of the 57th Annual Meeting of the Association for Computational Linguistics* (2019) <https://doi.org/10.18653/v1/p19-1356>.
45. A. I. Yang, *et al.*, Localization of dense intracranial electrode arrays using magnetic resonance imaging. *NeuroImage* **63**, 157–165 (2012).
46. T. Wolf, *et al.*, Transformers: State-of-the-Art Natural Language Processing in *Proceedings of the 2020 Conference on Empirical Methods in Natural Language Processing: System Demonstrations*, (Association for Computational Linguistics, 2020), pp. 38–45.
